# Supplementary material for: Implementation Effectiveness of a Parent-Directed YouTube Video (“It Doesn’t Have To Hurt”) on Evidence-Based Strategies to Manage Needle Pain: Descriptive Survey Study
Source: PubMed Central journal article supplement (PMC7081136; doi:10.2196/13552), 2020-03-04
Supplement: pediatrics_v3i1e13552_app1.pdf [file pediatrics_v3i1e13552_app1.pdf]

**Multimedia Appendix 1: Advertisement for promotion of video**

Visit [itdoesnthavetohurt.ca](http://itdoesnthavetohurt.ca) to view the award-winning video series!

Do your kids get upset about going to the doctor to get a needle?

**Strategies for Helping Children with Shots & Needles**



#itdoesnthavetohurt    @DrCChambers

Visit online [itdoesnthavetohurt.ca](http://itdoesnthavetohurt.ca) to view videos & learn more



**It Doesn't Have to Hurt™**  
Proven Pain Control for Children

**Centre for Pediatric Pain Research**  
SCIENCE HELPING CHILDREN
